# Supplementary material for: Creatine kinase mitochondrial 2 promotes the growth and progression of colorectal cancer via enhancing Warburg effect through lactate dehydrogenase B
Source: PeerJ. 2024 Jun 28;12:e17672. doi: 10.7717/peerj.17672 (PMC11216189; doi:10.7717/peerj.17672)
Supplement: Supplemental Information 1 [file peerj-12-17672-s001.xlsx]

## Sheet: Sheet5
Supplementary file 1 The raw data of clinicopathological features for the 220 patients with colorectal cancer
Number	distant metastasis	metastasis time (month)	metastasis time (day)	survival time (day)	survival time (month)	survival status	CKMT2 expression in CRC tissues	CKMT2 expression in distal para-cancerous tissues	gender	age (years)	primary site (colon=Colon, rectum=Rectum)	smoking status (never=Never, current=Current)	alcohol consumption (never=Never, daily or almost daily=Daily or almost daily)	histological type	differentiation	tumor size (cm)	TNM stage	T stage	N stage	M stage	CEA(ng/ml)
1	No	23	706	706	23	Dead	2.85	0.1	Male	84	Colon	Current	Daily or almost daily	Adenocarcinoma	Low grade	5*6	II	4	0	0	37.55
2	Yes	9	295	368	12	Dead	1	0.2	Female	81	Colon	Never	Never	Mucinous	Moderate grade	6*7	III	4	1	0	24.53
3	No	29	906	906	29	Alive	1.8	0.3	Male	47	Colon	Never	Never	Adenocarcinoma	Moderate grade	6*4	II	4	0	0	10.52
4	No	26	801	801	26	Alive	2	0.8	Male	53	Colon	Current	Daily or almost daily	Adenocarcinoma	Moderate grade	5*5	II	4	0	0	1.89
5	No	27	852	852	27	Alive	2	0.03	Male	63	Colon	Current	Never	Adenocarcinoma	Moderate grade	4*4	I	2	0	0	3.32
6	No	31	953	953	31	Alive	1.8	0.7	Male	79	Colon	Never	Never	Adenocarcinoma	Low grade	4*5	III	3	2	0	3.92
7	No	21	658	658	21	Alive	1.96	0	Male	65	Rectum	Current	Never	Adenocarcinoma	Moderate grade	4*4	I	2	0	0	5.13
8	No	24	746	746	24	Alive	1.9	0.2	Male	47	Colon	Never	Never	Adenocarcinoma	Moderate grade	7*6,3*3	III	4	1	0	1.39
9	No	30	940	940	30	Alive	1.6	0.4	Female	59	Colon	Never	Never	Adenocarcinoma	Moderate grade	2.5*1,2*0.8	III	3	1	0	9.69
10	No	6	199	199	6	Alive	2	0.7	Male	63	Colon	Never	Never	3	Moderate grade	6*3.5	II	3	0	0	3.19
11	No	27	836	836	27	Alive	1.6	0.3	Female	63	Colon	Never	Never	Adenocarcinoma	Moderate grade	4*4	I	2	0	0	0.62
12	Yes	0	0	659	21	Alive	1.6	0.5	Male	75	Colon	Current	Never	Mucinous	Moderate grade	9*7	IV	4	2	1	7.53
13	No	23	729	729	23	Alive	1	0.3	Female	76	Colon	Never	Never	Adenocarcinoma	Low grade	8*8	III	4	1	0	2.4
14	Yes	0	0	753	24	Dead	0.8	0.28	Female	49	Colon	Never	Never	Adenocarcinoma	Moderate grade	5*4	IV	4	1	1	12.88
15	No	6	196	196	6	Alive	2.94	0.4	Male	78	Colon	Never	Never	Adenocarcinoma	Moderate grade	4*3	II	4	0	0	9.37
16	Yes	15	475	533	17	Dead	1.96	0.8	Male	89	Colon	Current	Daily or almost daily	Adenocarcinoma	Low grade	4*3.5	II	4	0	0	70.37
17	No	36	1109	1109	36	Alive	1.8	0.5	Female	67	Colon	Never	Never	Adenocarcinoma	Moderate grade	5*4	III	4	1	0	23.79
18	No	24	757	757	24	Alive	1.9	0.5	Female	69	Colon	Never	Never	Adenocarcinoma	Moderate grade	5*5	I	2	0	0	18.07
19	No	31	957	957	31	Alive	1.1	0.4	Female	78	Colon	Never	Never	Adenocarcinoma	Moderate grade	3*3	II	4	0	0	24.24
20	No	31	949	949	31	Alive	0.9	0.2	Male	71	Colon	Current	Never	Adenocarcinoma	Low grade	3*2	III	3	1	0	2.67
21	No	7	234	234	7	Dead	1.2	0.05	Female	80	Colon	Never	Never	Mucinous	Moderate grade	6*5.5	III	3	2	0	122.63
22	No	24	750	750	24	Alive	1.8	0.8	Female	57	Colon	Never	Never	Adenocarcinoma	Moderate grade	5*5	II	3	0	0	0.93
23	No	30	932	932	30	Alive	2	1	Male	77	Colon	Never	Never	Adenocarcinoma	Moderate grade	3.5*3	II	4	0	0	3.66
24	No	2	76	76	2	Dead	1.9	0.18	Female	83	Colon	Never	Never	Adenocarcinoma	Moderate grade	4.5*4	II	4	0	0	7.45
25	No	18	569	569	18	Alive	2	0.6	Female	66	Colon	Never	Never	Adenocarcinoma	Moderate grade	3.5*3	I	2	0	0	1.62
26	Yes	0	0	1128	37	Alive	1.9	0.6	Female	64	Colon	Never	Never	Adenocarcinoma	Moderate grade	5*5	IV	3	2	1	5.47
27	No	26	820	820	26	Alive	1.7	0.5	Male	42	Colon	Current	Daily or almost daily	Adenocarcinoma	Moderate grade	3*2.5	III	4	1	0	3.44
28	No	27	843	843	27	Alive	0.7	0.2	Female	73	Colon	Never	Never	Adenocarcinoma	Moderate grade	5*6	II	4	0	0	12.24
29	No	29	910	910	29	Alive	1.6	0.4	Male	84	Colon	Never	Never	Adenocarcinoma	Moderate grade	6*4.5	I	2	0	0	6.39
30	Yes	19	597	837	27	Dead	1.6	0.5	Female	76	Colon	Never	Never	Adenocarcinoma	Low grade	6*7	III	4	1	0	0.82
31	No	18	576	576	18	Alive	1.9	0.65	Male	67	Colon	Never	Never	Adenocarcinoma	Moderate grade	4*5.5	II	4	0	0	2.2
32	No	29	898	898	29	Alive	1.9	0.7	Male	69	Colon	Never	Never	3	Moderate grade	4*4	III	3	1	0	9.5
33	Yes	0	0	560	18	Alive	3	0.12	Female	57	Colon	Never	Never	Adenocarcinoma	Moderate grade	3*3	IV	4	0	1	3.63
34	Yes	0	0	363	11	Dead	1.9	0.6	Female	84	Colon	Never	Never	Adenocarcinoma	Moderate grade	6*3.5,10*6	IV	3	0	1	16.37
35	No	37	1144	1144	37	Alive	1.7	0.28	Male	53	Colon	Never	Daily or almost daily	Adenocarcinoma	Moderate grade	4*5	II	4	0	0	1.33
36	Yes	26	801	900	29	Alive	1.2	0.4	Female	58	Colon	Never	Never	Adenocarcinoma	Moderate grade	3.5*3.5	III	3	2	0	3.55
37	No	31	968	968	31	Dead	2.1	0.36	Male	77	Colon	Never	Never	Adenocarcinoma	Low grade	5*4	II	4	0	0	2.58
38	No	38	1176	1176	38	Alive	1.3	0.3	Male	67	Colon	Current	Daily or almost daily	Adenocarcinoma	Moderate grade	4.5*4.2	I	2	0	0	3.98
39	No	27	851	851	27	Alive	1.2	0.3	Male	76	Colon	Current	Daily or almost daily	Adenocarcinoma	Moderate grade	5*4	III	4	1	0	4.72
40	Yes	28	870	1109	36	Dead	2	0.6	Male	90	Colon	Current	Never	Adenocarcinoma	Moderate grade	4*4	III	4	1	0	1.05
41	No	11	338	338	11	Alive	1.8	0.6	Male	51	Colon	Current	Never	Adenocarcinoma	High grade	6*4	II	4	0	0	5.89
42	No	18	553	553	18	Alive	1.5	0.5	Male	79	Colon	Never	Never	Adenocarcinoma	High grade	3*1	I	2	0	0	1.3
43	No	7	242	242	7	Alive	1.9	0.12	Female	51	Colon	Never	Never	Adenocarcinoma	High grade	5*5	III	4	1	0	20.42
44	No	31	943	943	31	Alive	1.2	0.16	Male	72	Colon	Current	Never	Adenocarcinoma	Moderate grade	5*4	II	3	0	0	1.69
45	Yes	0	0	212	6	Dead	1.6	0.2	Male	80	Colon	Never	Never	Adenocarcinoma	Moderate grade	3*2.5	IV	4	1	1	11.54
46	No	30	938	938	30	Alive	1.4	0.2	Male	77	Colon	Never	Never	Adenocarcinoma	Moderate grade	5*4	II	4	0	0	1.15
47	No	11	356	356	11	Alive	2.7	1	Female	80	Colon	Never	Never	3	Moderate grade	5*6	II	4	0	0	7.45
48	No	30	933	933	30	Alive	1.2	0.3	Male	53	Colon	Current	Daily or almost daily	Adenocarcinoma	Moderate grade	3*4，8*6	III	3	2	0	3.69
49	Yes	0	0	335	11	Dead	1.4	0.6	Female	62	Colon	Never	Never	Adenocarcinoma	Moderate grade	10*8	IV	4	2	1	9.34
50	Yes	0	0	343	11	Dead	1.8	0.6	Female	80	Colon	Never	Never	3	Moderate grade	7*7	IV	4	1	1	4.42
51	No	20	623	623	20	Alive	2	0.23	Male	53	Colon	Current	Daily or almost daily	Adenocarcinoma	Moderate grade	6*4	II	3	0	0	2.14
52	No	27	828	828	27	Alive	1.8	0.1	Male	69	Colon	Never	Never	Adenocarcinoma	Moderate grade	1.5*1.5	III	2	1	0	3.31
53	No	30	922	922	30	Alive	1.6	0.4	Male	79	Colon	Current	Daily or almost daily	Mucinous	High grade	15*10	II	4	0	0	8.69
54	No	12	388	388	12	Alive	1.2	1	Male	65	Colon	Never	Never	3	Moderate grade	5*3	III	3	1	0	9.19
55	No	21	659	659	21	Alive	2	0.8	Female	52	Colon	Never	Never	Adenocarcinoma	High grade	4*5	II	4	0	0	1.76
56	No	21	651	651	21	Alive	1	0.5	Male	61	Rectum	Current	Daily or almost daily	Adenocarcinoma	Moderate grade	3*3	I	2	0	0	1.41
57	No	32	990	990	32	Alive	1.6	0.6	Male	73	Colon	Current	Daily or almost daily	Adenocarcinoma	Moderate grade	4*3	I	2	0	0	4.88
58	No	20	615	615	20	Alive	1.4	0.26	Male	63	Rectum	Never	Never	Adenocarcinoma	Low grade	4*4	III	2	2	0	3.69
59	Yes	0	0	586	19	Alive	0.9	0.1	Female	69	Rectum	Never	Never	Adenocarcinoma	High grade	5.5*4	IV	4	2	1	3.76
60	No	31	969	969	31	Alive	1.4	0.6	Male	61	3	Current	Never	Adenocarcinoma	Moderate grade	4*5	III	2	2	0	6.47
61	No	7	242	242	7	Alive	2	0.14	Male	52	Rectum	Current	Daily or almost daily	Adenocarcinoma	Moderate grade	4*3	II	4	0	0	4
62	Yes	13	411	952	31	Alive	1.8	0.4	Female	74	Rectum	Never	Never	Adenocarcinoma	Moderate grade	4*3.5	III	4	1	0	18.91
63	No	19	587	587	19	Alive	0.3	0.4	Male	76	Colon	Never	Never	Mucinous	Moderate grade	2*2	III	2	2	0	2
64	Yes	24	753	939	30	Alive	1.6	0.5	Male	72	Colon	Current	Daily or almost daily	3	Low grade	4*4	III	4	2	0	3.03
65	No	30	925	925	30	Alive	1	0.08	Female	72	Rectum	Never	Never	Adenocarcinoma	Moderate grade	3.5*3	III	4	1	0	3.49
66	No	30	932	932	30	Alive	1.8	0.8	Male	72	Rectum	Current	Daily or almost daily	Adenocarcinoma	Moderate grade	3.5*2	II	3	0	0	4.51
67	No	30	925	925	30	Alive	1.4	0.13	Female	63	Rectum	Never	Never	Adenocarcinoma	Low grade	4*3.5	II	4	0	0	2.41
68	No	30	916	916	30	Alive	1.6	0.8	Male	74	Colon	Never	Never	Adenocarcinoma	Moderate grade	5*5	II	4	0	0	2.42
69	No	18	549	549	18	Alive	1.8	0.4	Male	74	Rectum	Never	Never	Adenocarcinoma	Low grade	6*5	III	3	1	0	3
70	No	29	912	912	29	Alive	0.7	1	Male	54	Colon	Current	Daily or almost daily	Adenocarcinoma	Moderate grade	1*0.8	I	1	0	0	2.83
71	Yes	11	349	369	12	Dead	1.6	0.4	Male	82	Rectum	Never	Never	Adenocarcinoma	Low grade	4*4	III	4	2	0	11.71
72	No	29	892	892	29	Alive	1.6	0.6	Male	62	Colon	Current	Never	Mucinous	Moderate grade	3*2.5	III	4	1	0	6.79
73	No	29	893	893	29	Alive	1.4	1.2	Female	61	Colon	Never	Never	Adenocarcinoma	Moderate grade	4*4	III	4	1	0	115.33
74	No	18	553	553	18	Alive	2	0.3	Male	62	Rectum	Current	Daily or almost daily	Adenocarcinoma	Moderate grade	1*0.5	I	1	0	0	4.17
75	No	5	177	177	5	Alive	2	0.2	Male	55	Rectum	Current	Daily or almost daily	Adenocarcinoma	Moderate grade	3*2	I	2	0	0	9.23
76	No	29	898	898	29	Alive	1.8	0.2	Male	46	Rectum	Never	Never	Adenocarcinoma	Moderate grade	4*3	II	3	0	0	0.89
77	No	17	542	542	17	Alive	2	0.3	Male	65	Colon	Current	Never	Adenocarcinoma	Moderate grade	4*5	II	4	0	0	5.09
78	No	29	891	891	29	Alive	1.4	1	Male	60	Rectum	Never	Never	Adenocarcinoma	Moderate grade	4*2	II	4	0	0	3.62
79	No	17	535	535	17	Alive	1.6	0.26	Male	81	Rectum	Never	Never	Adenocarcinoma	Moderate grade	4*4	I	2	0	0	3.94
80	No	29	895	895	29	Alive	1.4	0.4	Male	65	Rectum	Never	Never	Adenocarcinoma	Moderate grade	6*3.5	I	2	0	0	7.68
81	No	5	157	157	5	Alive	2	0.1	Male	77	Rectum	Never	Never	Adenocarcinoma	Moderate grade	5*6	I	2	0	0	2.29
82	No	29	895	895	29	Alive	1.9	0.32	Male	78	Rectum	Never	Never	Adenocarcinoma	High grade	4*4	II	4	0	0	3.07
83	No	29	897	897	29	Alive	2	0.37	Female	57	Rectum	Never	Never	Adenocarcinoma	Moderate grade	3.2*3	III	3	1	0	3.57
84	No	6	188	188	6	Alive	1.5	1	Male	79	Colon	Never	Never	Adenocarcinoma	High grade	6*5	I	2	0	0	1.3
85	No	30	939	939	30	Alive	1.4	0.3	Male	65	Colon	Current	Daily or almost daily	Adenocarcinoma	Moderate grade	4.5*2.5	II	3	0	0	1.7
86	No	10	334	334	10	Alive	1.8	0.35	Female	72	Colon	Never	Never	Mucinous	Low grade	5*5.5	III	3	1	0	5.1
87	No	32	975	975	32	Alive	1.6	0.6	Female	54	Colon	Never	Never	Adenocarcinoma	Moderate grade	6*5	III	4	1	0	1.62
88	Yes	0	0	752	24	Alive	1.9	0.3	Male	47	Colon	Never	Daily or almost daily	Adenocarcinoma	Low grade	3*2	IV	4	0	1	75.07
89	No	11	348	348	11	Alive	3	0.9	Male	72	Colon	Never	Never	Adenocarcinoma	Moderate grade	4*5	II	4	0	0	4.4
90	Yes	0	0	893	29	Alive	2	0.25	Male	75	Colon	Never	Daily or almost daily	Mucinous	Low grade	6*5	IV	4	0	1	6.74
91	No	17	518	518	17	Alive	1.2	0.3	Female	90	Colon	Never	Never	Adenocarcinoma	High grade	4*3	II	3	0	0	1.63
92	No	33	1032	1032	33	Alive	1.3	1	Male	48	Colon	Current	Never	Adenocarcinoma	Moderate grade	5*5	II	4	0	0	27.56
93	No	36	1115	1115	36	Alive	0.5	0.4	Female	73	Colon	Never	Never	Mucinous	High grade	7*6	I	2	0	0	2.25
94	Yes	0	0	1008	33	Alive	1.5	0.64	Male	54	Colon	Never	Never	Adenocarcinoma	Moderate grade	5*5	IV	4	0	1	1.71
95	No	15	478	478	15	Alive	2	1.2	Female	70	Colon	Never	Never	Adenocarcinoma	Moderate grade	7*6	III	4	1	0	3.07
96	No	24	748	748	24	Dead	1.6	0.34	Female	79	Colon	Never	Never	Adenocarcinoma	Moderate grade	3*3	II	4	0	0	6.75
97	Yes	0	0	750	24	Dead	1.4	0.1	Male	48	Colon	Current	Daily or almost daily	Adenocarcinoma	Low grade	2*2	IV	4	1	1	1388.39
98	No	22	688	688	22	Alive	1.7	0.3	Male	59	Colon	Never	Never	Adenocarcinoma	Moderate grade	5*5	II	4	0	0	2.6
99	No	29	898	898	29	Dead	1.96	0.55	Male	73	Colon	Current	Daily or almost daily	Adenocarcinoma	Moderate grade	8*6	II	4	0	0	3.81
100	No	25	789	789	25	Alive	1.2	0.3	Female	80	Colon	Never	Never	Mucinous	Moderate grade	7*7	III	4	2	0	10.25
101	No	20	609	609	20	Alive	2	1	Male	82	Colon	Never	Never	Adenocarcinoma	Moderate grade	5*5	III	2	1	0	2.94
102	No	34	1041	1041	34	Dead	1.2	0.8	Male	68	Colon	Current	Daily or almost daily	3	Low grade	4*3	III	3	2	0	0.84
103	No	13	422	422	13	Alive	2	0.1	Male	53	Colon	Current	Daily or almost daily	Adenocarcinoma	Moderate grade	4.5*3.5	I	1	0	0	4.11
104	Yes	1	55	84	2	Dead	1.6	0.4	Male	78	Colon	Current	Daily or almost daily	Adenocarcinoma	Moderate grade	3*3.5	III	4	2	0	23.82
105	No	28	876	876	28	Alive	0.6	0.26	Female	65	Colon	Never	Never	Adenocarcinoma	Moderate grade	3*3.5	III	4	1	0	2.31
106	No	22	681	681	22	Alive	1.6	0.1	Male	47	Colon	Current	Daily or almost daily	Adenocarcinoma	Low grade	4*4	III	4	1	0	2.13
107	No	36	1105	1105	36	Alive	1	0.2	Female	67	3	Never	Never	Mucinous	Moderate grade	5*5	III	4	1	0	30.02
108	No	23	719	719	23	Alive	1.9	0.4	Female	81	Colon	Never	Never	Mucinous	Low grade	10*6.5	II	4	0	0	11.1
109	No	36	1118	1118	36	Alive	1.8	0.3	Female	35	Colon	Never	Never	Adenocarcinoma	Moderate grade	1*1.5	I	1	0	0	1.45
110	No	15	464	464	15	Dead	1.2	0.42	Male	69	Colon	Never	Never	Adenocarcinoma	Moderate grade	4*4	III	2	1	0	72.31
111	No	29	885	885	29	Alive	1.1	0.38	Male	79	Colon	Current	Daily or almost daily	Adenocarcinoma	Moderate grade	4*3	III	4	1	0	2.12
112	No	16	515	515	16	Alive	2	1.6	Male	69	Colon	Never	Never	3	Moderate grade	6*5	II	3	0	0	4.62
113	Yes	16	500	846	27	Alive	1.2	0.5	Male	77	Colon	Current	Never	Adenocarcinoma	Moderate grade	5*5	I	2	0	0	2.4
114	Yes	19	603	786	25	Dead	3	1.2	Female	57	Colon	Never	Never	Adenocarcinoma	Moderate grade	6*10	III	3	2	0	5.16
115	Yes	0	0	191	6	Dead	1.4	0.4	Male	64	Colon	Never	Never	Adenocarcinoma	Low grade	5*6	IV	4	1	1	11.38
116	Yes	0	0	763	25	Alive	1.9	0.2	Female	64	Colon	Never	Never	Adenocarcinoma	Moderate grade	5*5	IV	3	2	1	5.47
117	No	30	933	933	30	Alive	1.2	0.13	Male	53	Colon	Current	Daily or almost daily	Adenocarcinoma	Moderate grade	8*6,3*4	III	3	2	0	3.69
118	No	23	715	715	23	Alive	1.3	0.27	Female	88	Colon	Never	Never	3	Moderate grade	4*4	II	4	0	0	17.03
119	No	37	1128	1128	37	Alive	0.9	0.2	Male	71	Colon	Current	Never	Adenocarcinoma	Low grade	3*1	III	3	1	0	2.67
120	No	18	567	567	18	Alive	2	0.5	Male	77	Colon	Never	Never	Adenocarcinoma	Moderate grade	6*5	II	4	0	0	3.66
121	Yes	6	193	303	9	Dead	1.96	0.3	Male	44	Rectum	Current	Never	Adenocarcinoma	Low grade	1.5*4	III	4	2	0	8.6
122	No	9	292	292	9	Dead	1.6	0.6	Male	77	Colon	Current	Daily or almost daily	Adenocarcinoma	Moderate grade	2.5*1.5	III	4	1	0	2.42
123	Yes	0	0	445	14	Dead	1.8	0.22	Male	81	Colon	Never	Daily or almost daily	Adenocarcinoma	Moderate grade	2.5*2.5	IV	2	0	1	1.91
124	No	27	851	851	27	Alive	1.4	0.38	Male	78	Rectum	Never	Never	Adenocarcinoma	Moderate grade	2*2	I	2	0	0	3.23
125	Yes	22	684	856	28	Alive	1.5	1	Male	60	Rectum	Never	Never	Adenocarcinoma	Moderate grade	5*5	III	4	1	0	3.43
126	No	28	857	857	28	Alive	0.7	0.4	Male	64	Rectum	Never	Daily or almost daily	Mucinous	Moderate grade	5*5.5	III	4	1	0	4.45
127	Yes	0	0	851	27	Alive	0.6	0.37	Male	67	Rectum	Current	Daily or almost daily	Adenocarcinoma	Moderate grade	3*3	IV	4	0	1	6.47
128	Yes	3	110	355	11	Dead	2.7	0.8	Male	72	Rectum	Current	Daily or almost daily	Adenocarcinoma	Moderate grade	5*6	III	4	1	0	14.63
129	No	39	1188	1188	39	Alive	0.7	0.5	Female	63	Rectum	Never	Never	Adenocarcinoma	Moderate grade	4*3	III	4	1	0	3.61
130	No	39	1197	1197	39	Alive	1.6	0.23	Male	40	Rectum	Never	Never	Adenocarcinoma	Moderate grade	3*3	III	2	1	0	2.88
131	No	27	834	834	27	Alive	1.7	0.08	Female	64	Rectum	Never	Never	Adenocarcinoma	Low grade	5*5	III	4	1	0	10.47
132	No	8	261	261	8	Alive	1.6	0.6	Male	61	Rectum	Never	Never	Adenocarcinoma	Moderate grade	5*4	II	4	0	0	4.09
133	No	38	1161	1161	38	Alive	0.8	0.06	Female	79	Rectum	Never	Never	Adenocarcinoma	Moderate grade	3*4	II	3	0	0	45.04
134	No	37	1136	1136	37	Alive	1.2	0.22	Male	77	Rectum	Never	Never	Adenocarcinoma	Moderate grade	3*3	III	3	1	0	6.43
135	No	24	757	757	24	Alive	1.6	0.28	Female	60	Rectum	Never	Never	Adenocarcinoma	Moderate grade	3*2.5	I	2	0	0	4.56
136	No	29	902	902	29	Alive	1.4	0.3	Female	75	Rectum	Never	Never	Adenocarcinoma	High grade	4*4	II	4	0	0	6.51
137	No	24	753	753	24	Alive	1	0.1	Female	82	Rectum	Never	Never	Adenocarcinoma	Moderate grade	3*3	I	2	0	0	2.73
138	Yes	0	0	510	16	Dead	0.4	0.35	Female	73	Rectum	Never	Never	Adenocarcinoma	Low grade	6*3	IV	4	1	1	20.7
139	Yes	0	0	1104	36	Alive	1.6	0.75	Male	56	Rectum	Current	Daily or almost daily	Adenocarcinoma	Moderate grade	4*4	IV	4	0	1	169.27
140	No	12	371	371	12	Alive	1.6	1.2	Male	58	Rectum	Never	Never	Adenocarcinoma	Moderate grade	7*6	III	4	1	0	38.65
141	No	35	1080	1080	35	Alive	1.4	0.8	Female	53	Colon	Never	Never	Adenocarcinoma	Moderate grade	4*3.5	II	4	0	0	20.43
142	No	23	725	725	23	Alive	1.8	0.17	Male	69	Rectum	Never	Never	Adenocarcinoma	High grade	5*5	I	2	0	0	2.27
143	No	1	33	33	1	Dead	1.96	0.24	Male	53	Rectum	Never	Never	Adenocarcinoma	Moderate grade	4*3,1.5*1.5,1.5*1.5	I	1	0	0	0.93
144	No	10	329	329	10	Dead	1	0.3	Male	63	Rectum	Current	Daily or almost daily	Adenocarcinoma	Moderate grade	7*6	II	4	0	0	10.31
145	No	27	840	840	27	Dead	0.4	0.4	Female	81	Colon	Never	Never	Adenocarcinoma	Low grade	8*7	III	3	1	0	4.73
146	No	28	880	880	28	Alive	0.9	0.5	Female	72	Colon	Never	Never	Adenocarcinoma	Low grade	1.5*2	II	4	0	0	114.73
147	No	23	712	712	23	Dead	1.96	0.6	Male	88	Rectum	Never	Never	Adenocarcinoma	Low grade	5*5	II	4	0	0	12.03
148	No	16	503	503	16	Alive	1.4	0.26	Male	76	Rectum	Never	Never	Adenocarcinoma	Moderate grade	5*5	II	4	0	0	1.96
149	No	21	650	650	21	Alive	0.4	0.6	Male	86	Rectum	Never	Never	Adenocarcinoma	Moderate grade	7*7	II	3	0	0	2.82
150	No	21	652	652	21	Dead	1.6	0.8	Male	60	Rectum	Current	Daily or almost daily	Adenocarcinoma	High grade	7*8	II	4	0	0	2.01
151	No	32	991	991	32	Alive	0.85	0.7	Male	76	Colon	Never	Daily or almost daily	Mucinous	High grade	3*3	II	4	0	0	2.86
152	No	36	1123	1123	36	Alive	0.7	0.18	Male	87	Rectum	Never	Never	Adenocarcinoma	Moderate grade	3*3	I	1	0	0	2.2
153	No	8	266	266	8	Alive	1.8	0.26	Male	74	Rectum	Never	Never	Adenocarcinoma	Moderate grade	7*7	II	4	0	0	1.91
154	No	31	956	956	31	Alive	1.9	0.5	Female	66	Colon	Never	Never	Adenocarcinoma	Moderate grade	4*4	II	3	0	0	1.5
155	Yes	13	416	700	23	Dead	1.9	0	Male	55	Rectum	Never	Never	Adenocarcinoma	Moderate grade	3*3	III	4	1	0	11.58
156	Yes	0	0	950	31	Alive	2.4	0.8	Male	61	Colon	Never	Never	Adenocarcinoma	Moderate grade	6*6	IV	4	1	1	2.76
157	No	18	574	574	18	Alive	1.5	0.9	Female	65	Rectum	Never	Never	Adenocarcinoma	Moderate grade	5*5	II	4	0	0	5.1
158	Yes	26	818	946	31	Alive	1.9	0.5	Male	62	Rectum	Current	Daily or almost daily	Adenocarcinoma	Moderate grade	3*3	II	4	0	0	15.14
159	No	31	947	947	31	Alive	1.2	0.36	Female	58	Rectum	Never	Never	Adenocarcinoma	Moderate grade	1*1	I	1	0	0	0.96
160	No	38	1172	1172	38	Alive	1.4	0.5	Female	60	Rectum	Never	Never	Adenocarcinoma	Moderate grade	6*5	III	3	2	0	2.6
161	Yes	10	309	451	14	Dead	1.4	1	Male	77	Rectum	Current	Daily or almost daily	Adenocarcinoma	Low grade	4*3	III	4	2	0	5.38
162	No	10	310	310	10	Dead	2.85	0.5	Female	71	Rectum	Never	Never	Adenocarcinoma	Moderate grade	6*6	II	4	0	0	17.59
163	No	30	917	917	30	Alive	1.8	0.22	Male	57	Rectum	Current	Daily or almost daily	Adenocarcinoma	Moderate grade	3*4	III	4	1	0	8.25
164	Yes	38	1171	1171	38	Dead	1.8	0.44	Male	65	Rectum	Never	Never	Adenocarcinoma	Moderate grade	7*6	III	3	1	0	4.02
165	Yes	28	871	976	32	Dead	2.1	0.5	Male	70	Rectum	Never	Never	Adenocarcinoma	Moderate grade	5*5	II	3	0	0	1.15
166	No	5	167	167	5	Alive	1.96	0.3	Male	68	Rectum	Never	Never	Adenocarcinoma	High grade	8*8	I	1	0	0	3.15
167	No	17	522	522	17	Alive	2	0.4	Male	84	Colon	Never	Never	Mucinous	Moderate grade	5*6	II	4	0	0	2.2
168	Yes	0	0	125	4	Dead	1.9	0.04	Female	85	3	Never	Never	Adenocarcinoma	Moderate grade	7*7,4*3	IV	4	1	1	102.02
169	No	28	872	872	28	Alive	0.8	0.32	Male	64	Rectum	Never	Never	Adenocarcinoma	Moderate grade	3*3	III	4	1	0	12.17
170	No	28	873	873	28	Alive	0.7	0.5	Female	56	Rectum	Never	Never	Adenocarcinoma	Moderate grade	4*4	I	2	0	0	13.79
171	No	4	128	128	4	Alive	1.9	0.06	Female	68	Rectum	Never	Daily or almost daily	Adenocarcinoma	Moderate grade	4*3	III	4	2	0	9.59
172	No	27	823	823	27	Alive	1.4	0.2	Female	71	Rectum	Never	Never	Adenocarcinoma	Moderate grade	8*8	I	2	0	0	5.75
173	No	15	467	467	15	Alive	1.4	0.3	Female	61	Rectum	Never	Never	Adenocarcinoma	Moderate grade	5*5	II	3	0	0	1.44
174	No	27	824	824	27	Alive	1.4	0.09	Female	79	Rectum	Never	Never	Adenocarcinoma	High grade	2*2,1.5*1	I	1	0	0	5.86
175	No	14	442	442	14	Alive	1.4	1	Female	70	Colon	Never	Never	Adenocarcinoma	Moderate grade	3*3，3*3	II	3	0	0	1.06
176	No	25	784	784	25	Alive	0.8	0.3	Female	86	Rectum	Never	Never	Adenocarcinoma	Moderate grade	3*3	II	4	0	0	10.24
177	No	11	361	361	11	Dead	1.9	0.25	Female	80	Colon	Never	Never	Adenocarcinoma	Moderate grade	6*5	II	4	0	0	3.88
178	No	25	785	785	25	Alive	1.7	0.3	Male	65	Rectum	Current	Never	Adenocarcinoma	Moderate grade	4*3	I	2	0	0	1.56
179	Yes	19	594	907	29	Dead	2.4	0.3	Male	47	Rectum	Current	Daily or almost daily	Adenocarcinoma	Moderate grade	4*3	III	4	2	0	13.51
180	No	37	1148	1148	37	Alive	2.1	0.9	Male	82	Rectum	Current	Daily or almost daily	Adenocarcinoma	Moderate grade	7*6	II	3	0	0	43.91
181	No	37	1127	1127	37	Alive	1.4	0.1	Female	57	Rectum	Never	Never	Adenocarcinoma	Moderate grade	3*3	III	4	1	0	0.81
182	No	24	758	758	24	Alive	2.4	0.4	Female	65	Rectum	Never	Never	Adenocarcinoma	High grade	7*6	II	4	0	0	2.1
183	Yes	31	952	1080	35	Alive	1.7	0.84	Female	64	Rectum	Never	Never	Adenocarcinoma	Moderate grade	3*3	III	4	1	0	2.21
184	No	22	673	673	22	Dead	2	0.7	Male	84	Rectum	Never	Never	Adenocarcinoma	Moderate grade	7*6	III	4	1	0	16.87
185	No	24	739	739	24	Alive	1.4	0.66	Male	71	Colon	Never	Never	Mucinous	High grade	5*6	I	2	0	0	4.92
186	No	22	699	699	22	Alive	0.6	0.2	Male	64	Rectum	Current	Daily or almost daily	Adenocarcinoma	Moderate grade	5*5	II	4	0	0	2.25
187	No	35	1078	1078	35	Alive	1.7	0.3	Female	65	Rectum	Never	Never	Adenocarcinoma	Moderate grade	5*6	II	4	0	0	55.94
188	Yes	29	903	936	30	Dead	1.8	0.4	Male	76	Rectum	Current	Daily or almost daily	Adenocarcinoma	Moderate grade	4*3	II	4	0	0	3.82
189	No	34	1049	1049	34	Alive	0.6	0.42	Male	73	Rectum	Never	Never	Adenocarcinoma	Moderate grade	8*7	III	3	1	0	5.59
190	No	22	689	689	22	Alive	1.2	1	Male	62	Rectum	Never	Never	Adenocarcinoma	High grade	4*5	II	4	0	0	0.92
191	No	22	684	684	22	Alive	1.4	0.06	Male	69	Colon	Never	Daily or almost daily	Adenocarcinoma	Moderate grade	5*6	III	4	2	0	1.51
192	No	33	1022	1022	33	Alive	1.8	0.4	Male	51	Rectum	Never	Never	Adenocarcinoma	Moderate grade	4*5	II	4	0	0	43.6
193	No	18	567	567	18	Dead	1.6	0.8	Female	84	Colon	Never	Daily or almost daily	Adenocarcinoma	High grade	5*6	II	4	0	0	15.91
194	No	33	1032	1032	33	Alive	1.5	1	Male	67	Rectum	Never	Never	Adenocarcinoma	Moderate grade	6*6	III	4	2	0	4.23
195	No	21	649	649	21	Alive	1.8	0.2	Female	38	Rectum	Never	Never	Adenocarcinoma	Moderate grade	4*3	II	4	0	0	0.5
196	No	33	1008	1008	33	Alive	1.7	0.6	Male	78	Colon	Never	Never	Adenocarcinoma	Moderate grade	4*4	II	4	0	0	15.92
197	Yes	7	242	278	9	Dead	1.8	1	Male	84	Rectum	Never	Never	Adenocarcinoma	Low grade	12*5	II	4	0	0	2
198	No	39	1189	1189	39	Alive	0.9	0.1	Male	47	Colon	Current	Daily or almost daily	Adenocarcinoma	Moderate grade	4*5	III	4	2	0	5.99
199	No	29	889	889	29	Alive	1.8	0.6	Female	53	Colon	Never	Never	Adenocarcinoma	Moderate grade	2*3	III	4	1	0	1.64
200	Yes	0	0	484	15	Dead	1.9	0.6	Female	85	Colon	Never	Never	Adenocarcinoma	Low grade	4*4	IV	4	0	1	7131.91
201	Yes	23	705	897	29	Dead	2.4	0.35	Female	79	Colon	Never	Never	Adenocarcinoma	Low grade	6*6	II	4	0	0	6.5
202	Yes	14	451	863	28	Dead	1.5	0.04	Male	57	Colon	Never	Never	Adenocarcinoma	Moderate grade	6*5	II	4	0	0	3.16
203	No	27	832	832	27	Dead	0.7	0.5	Female	88	Colon	Never	Never	Adenocarcinoma	Moderate grade	4*3	III	4	1	0	28.16
204	No	21	655	655	21	Alive	2.4	0.6	Female	83	Rectum	Never	Never	Adenocarcinoma	Moderate grade	5*5	III	4	1	0	3.49
205	No	30	940	940	30	Alive	1.6	0.24	Female	59	Colon	Never	Never	Adenocarcinoma	Moderate grade	2*2	III	3	1	0	9.69
206	No	33	1015	1015	33	Alive	1.4	0.2	Male	54	Rectum	Current	Daily or almost daily	Adenocarcinoma	Moderate grade	4*3.5	II	4	0	0	16.23
207	No	7	227	227	7	Alive	1.9	0.3	Male	68	Colon	Current	Never	Mucinous	Low grade	7*4	II	3	0	0	5.69
208	No	21	659	659	21	Dead	0.9	0.4	Male	79	Colon	Current	Never	Adenocarcinoma	Moderate grade	4.5*4	III	4	1	0	14.18
209	No	13	400	400	13	Alive	2.85	0.64	Male	88	Rectum	Never	Never	Adenocarcinoma	Moderate grade	2*2	III	4	1	0	4.03
210	No	15	484	484	15	Alive	1.7	0.2	Female	83	Colon	Never	Never	Adenocarcinoma	Low grade	5*4	II	3	0	0	8.68
211	Yes	15	463	463	15	Dead	2.7	0.3	Female	72	Colon	Never	Never	Adenocarcinoma	Moderate grade	5*5	III	3	2	0	14.81
212	No	38	1169	1169	38	Alive	0.8	0.37	Male	61	3	Never	Never	Adenocarcinoma	Moderate grade	3.5*3	II	4	0	0	2.3
213	No	33	1028	1028	33	Dead	1.96	0.1	Male	76	Colon	Never	Never	Adenocarcinoma	Low grade	6*5	II	4	0	0	22.36
214	No	17	542	542	17	Dead	1.9	1	Male	83	Colon	Never	Never	Adenocarcinoma	Moderate grade	4*4	III	4	1	0	17.66
215	No	25	773	773	25	Alive	1.5	0.03	Female	47	Colon	Never	Never	Adenocarcinoma	Moderate grade	5*6	II	3	0	0	0.8
216	No	10	308	308	10	Alive	3	0.7	Female	57	Colon	Never	Never	Adenocarcinoma	Moderate grade	3*4	III	4	2	0	1.76
217	No	38	1165	1165	38	Alive	0.7	0.3	Male	86	Colon	Never	Never	Adenocarcinoma	High grade	3*2.5	I	1	0	0	1.71
218	No	33	1006	1006	33	Alive	1.4	0.2	Male	64	Colon	Current	Daily or almost daily	Adenocarcinoma	Moderate grade	4*3	II	4	0	0	4.72
219	Yes	28	863	1017	33	Dead	1.96	0.5	Male	75	Colon	Current	Daily or almost daily	Adenocarcinoma	Low grade	5*5	III	4	1	0	35.5
220	No	6	190	190	6	Alive	1.9	0.7	Male	84	Colon	Current	Never	Adenocarcinoma	Moderate grade	8*8	III	3	1	0	2.72
