# Supplementary material for: Creatine kinase mitochondrial 2 promotes the growth and progression of colorectal cancer via enhancing Warburg effect through lactate dehydrogenase B
Source: PeerJ. 2024 Jun 28;12:e17672. doi: 10.7717/peerj.17672 (PMC11216189; doi:10.7717/peerj.17672)
Supplement: Supplemental Information 4 [file peerj-12-17672-s004.xls]

## Sheet: Sheet1
ITEM TO CHECK	IMPORTANCE	CHECKLIST
EXPERIMENTAL DESIGN
Definition of experimental and control groups	E	7/193-195,9/261-265,10/302-304
Number within each group	E	three
Assay carried out by core lab or investigator's lab?	D	investigator's lab
Acknowledgement of authors' contributions	D	Yes
SAMPLE
Description	E	Cell Culture
Volume/mass of sample processed	D	4/114-127
Microdissection or macrodissection	E	Not Applicable
Processing procedure	E	Freezing below -20℃ for no more than 3 months
If frozen - how and how quickly?	E	Freezing below -20℃ for no more than 3 months
If fixed - with what, how quickly?	E	Not Applicable
Sample storage conditions and duration (especially for FFPE samples)	E	Freezing below -20℃ for no more than 3 months
NUCLEIC ACID EXTRACTION
Procedure and/or instrumentation	E	4/105-111
Name of kit and details of any modifications	E	4/105-109
Source of additional reagents used	D	Not Applicable
Details of DNase or RNAse treatment	E	4/106
Contamination assessment (DNA or RNA)	E	Blank control and negative control
Nucleic acid quantification	E	2-ΔΔCT
Instrument and method	E	4/109
Purity (A260/A280)	D	None
Yield	D	None
RNA integrity method/instrument	E	None
RIN/RQI or Cq of 3' and 5' transcripts	E	None
Electrophoresis traces	D	None
Inhibition testing (Cq dilutions, spike or other)	E	Not Applicable
REVERSE TRANSCRIPTION
Complete reaction conditions	E	4/105-111
Amount of RNA and reaction volume	E	4/107
Priming oligonucleotide (if using GSP) and concentration	E	Not Applicable
Reverse transcriptase and concentration	E	4/106
Temperature and time	E	4/109
Manufacturer of reagents and catalogue numbers	D	4/106,109
Cqs with and without RT	D*	Not Applicable
Storage conditions of cDNA	D	Freezing below -20℃ for no more than 3 months
qPCR TARGET INFORMATION
If multiplex, efficiency and LOD of each assay.	E	Not Applicable
Sequence accession number	E	ENSG00000131730
Location of amplicon	D	1140-1303
Amplicon length	E	164bp
In silico specificity screen (BLAST, etc)	E	Yes
Pseudogenes, retropseudogenes or other homologs?	D	None
Sequence alignment	D	BLAST
Secondary structure analysis of amplicon	D	None
Location of each primer by exon or intron (if applicable)	E	Not Applicable
What splice variants are targeted?	E	Not Applicable
qPCR OLIGONUCLEOTIDES
Primer sequences	E	CKMT2: sense strand 5’-ACGAGGCTGGGAGTTCAT-3’，antisense strand 5’-CACGCTTCTGGAGTCTTAGGTT-3’
RTPrimerDB Identification Number	D	Not Applicable
Probe sequences	D**	Not Applicable
Location and identity of any modifications	E	Not Applicable
Manufacturer of oligonucleotides	D	Not Applicable
Purification method	D	4/105
qPCR PROTOCOL
Complete reaction conditions	E	4/105-109
Reaction volume and amount of cDNA/DNA	E	4/109
Primer, (probe), Mg++ and dNTP concentrations	E	4/109
Polymerase identity and concentration	E	4/109
Buffer/kit identity and manufacturer	E	4/109
Exact chemical constitution of the buffer	D	4/109
Additives (SYBR Green I, DMSO, etc.)	E	4/109
Manufacturer of plates/tubes and catalog number	D	None
Complete thermocycling parameters	E	4/109
Reaction setup (manual/robotic)	D	manual
Manufacturer of qPCR instrument	E	4/109
qPCR VALIDATION
Evidence of optimisation (from gradients)	D	Not Applicable
Specificity (gel, sequence, melt, or digest)	E	Not Applicable
For SYBR Green I, Cq of the NTC	E	Cq of the NTC>40
Standard curves with slope and y-intercept	E	Not Applicable
PCR efficiency calculated from slope	E	Not Applicable
Confidence interval for PCR efficiency or standard error	D	Not Applicable
r2 of standard curve	E	Not Applicable
Linear dynamic range	E	Not Applicable
Cq variation at lower limit	E	Not Applicable
Confidence intervals throughout range	D	Not Applicable
Evidence for limit of detection	E	Not Applicable
If multiplex, efficiency and LOD of each assay.	E	Not Applicable
DATA ANALYSIS
qPCR analysis program (source, version)	E	ABI 7500 software
Cq method determination	E	Cq=40
Outlier identification and disposition	E	check
Results of NTCs	E	Negative
Justification of number and choice of reference genes	E	4/110-111
Description of normalisation method	E	4/110-111
Number and concordance of biological replicates	D	three
Number and stage (RT or qPCR) of technical replicates	E	Cq=40
Repeatability (intra-assay variation)	E	SD:0.019-0.107
Reproducibility (inter-assay variation, %CV)	D	0.07%-0.47%
Power analysis	D	Not Applicable
Statistical methods for result significance	E	6/175-179
Software (source, version)	E	6/175
Cq or raw data submission using RDML	D	None
Table 1. MIQE checklist for authors, reviewers and editors. All essential information (E) must be submitted with the manuscript. Desirable
information (D) should be submitted if available. If using primers obtained from RTPrimerDB, information on qPCR target, oligonucleotides,
protocols and validation is available from that source.
*: Assessing the absence of DNA using a no RT assay is essential when first extracting RNA. Once the sample has been validated as
RDNA-free, inclusion of a no-RT control is desirable, but no longer essential.
**: Disclosure of the probe sequence is highly desirable and strongly encouraged. However, since not all commercial pre-designed assay
vendors provide this information, it cannot be an essential requirement. Use of such assays is advised against.
